# Supplementary material
Source: publisher site journal article supplement (https://www.degruyter.com/publication/journal_key/WGST/downloadAsset/WGST_Call%20for%20Papers.pdf)
Supplement: Supplementary file 1 [file WGST_Call%20for%20Papers.pdf]

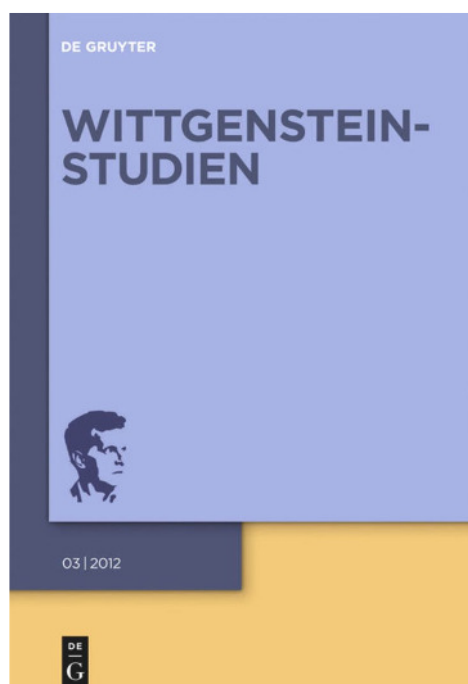

## CALL FOR MANUSCRIPTS

**WITTGENSTEIN-  
STUDIEN****Edited by**

Juliet Floyd, Yi Jiang, Stefan Majetschak, Richard Raatzsch, Nuno Venturinha, Wilhelm Vossenkuhl, Anja Weiberg

The yearbook *Wittgenstein-Studien* (published by de Gruyter) offers a forum for articles and materials on Ludwig Wittgenstein's philosophy, his *Nachlass* and life as well as his philosophical and cultural environment. We welcome contributions from both traditional and contemporary approaches.

What we offer to our authors:

- All submitted articles are peer-reviewed.
- All published articles are indexed to Scopus and Web of Science.
- Each article is assigned a DOI.
- Authors will be informed about the decision on acceptance (potentially with revision) or rejection of the submitted article usually within 6 to 8 weeks.
- In case that changes or improvements of the article are requested by the reviewers, the authors will receive profound/detailed feedback which helps them improving the article. Feedback is also provided in case of rejection.
- Continuous submission: The yearbook does not have any specific deadlines. However, if you want to ensure that your contribution (in case of acceptance) will be included in the next volume, you should submit your text by the end of October in order to complete the review process in time.

Articles should be prepared according to the journal's author guidelines

(<https://www.degruyter.com/journal/key/wgst/html>) and sent to the Editor-in-chief, Anja Weiberg, at [anja.weiberg\[at\]univie\[.\]ac\[.\]at](mailto:anja.weiberg@univie.ac.at). Book review proposals can be sent to the Book Review Editor, Venturinha, at [nventurinha.ifl\[at\]fcsh\[.\]unl\[.\]pt](mailto:nventurinha@ifl.fcsh.unl.pt). More information can be found at <https://www.degruyter.com/journal/key/WGST/html>.

**Book Review Editor**

Nuno Venturinha

**Managing Editor**

Jasmin Trächtler

**Editorial Advisory Board**

James Conant, University of Chicago, IL, USA • Esther Heinrich-Ramharter, University of Vienna, Austria • Wolfgang Kienzler, University of Jena, Germany • Felix Mühlhölzer, University of Göttingen, Germany • Volker Munz, AAU Klagenfurt, Austria • Christoph Pfisterer, University of Zurich, Switzerland • Bernhard Ritter, University of Graz, Austria, and University of Copenhagen, Denmark • Andreas Roser, Passau University, Germany • Josef G. F. Rothhaupt, LMU Munich, Germany • Joachim Schulte, University of Zurich, Switzerland • Jasmin Trächtler, TU Dortmund, Germany
